# Supplementary material for: Functional Redundancy in Candida auris Cell Surface Adhesins Crucial for Cell-Cell Interaction and Aggregation
Source: Research Square preprint supplement (doi:10.21203/rs.3.rs-4077218/v1), 2024-03-22
Supplement: Supplementary file 1 [file 3e42cb7acc08d87571224398.xlsx]

## Sheet: group82_Bio_vs_group87_Bio.de_g
Supplementary Table 1. Differentially expressed genes between AR0382/ AR0387 during in vitro biofilm growth (FDR <0.01, LFC >= |1.0|)
Values represent log (base 2) fold change of AR0382/ AR0387.
Gene ID	LFC (AR0382_in vitro/AR0387 in vitro)	FDR
B9J08_001458	8.61155	4.78043e-29
B9J08_004451	6.8096	7.97267e-37
B9J08_000592	5.99198	5.93226e-25
B9J08_001515	5.16395	5.69026e-28
B9J08_004112	5.06925	3.81027e-24
B9J08_004100	4.96597	2.50098e-19
B9J08_005072	4.73392	1.92158e-16
B9J08_001581	4.33666	1.31234e-17
B9J08_003891	4.0008	2.37782e-05
B9J08_001899	3.8909	7.92175e-10
B9J08_001155	3.88617	6.51205e-12
B9J08_004109	3.62476	1.85581e-10
B9J08_004446	3.55279	1.34241e-10
B9J08_002630	3.37475	1.00223e-07
B9J08_004545	3.32557	6.48754e-05
B9J08_004602	3.25102	3.15283e-10
B9J08_003657	3.08273	2.16441e-08
B9J08_002333	3.06282	3.82158e-06
B9J08_004098	3.04108	4.6236e-08
B9J08_002660	3.04069	1.63484e-10
B9J08_004544	2.97825	8.33604e-08
B9J08_004204	2.97301	1.00223e-07
B9J08_004066	2.85442	5.91727e-09
B9J08_000117	2.75862	0.00837364
B9J08_004161	2.57044	0.00622031
B9J08_001362	2.52252	2.12779e-08
B9J08_001660	2.51355	1.57639e-06
B9J08_002256	2.49623	3.70424e-06
B9J08_000005	2.45768	0.000207787
B9J08_004842	2.41391	0.00768436
B9J08_000008	2.30491	0.000515597
B9J08_002886	2.29818	6.55818e-07
B9J08_000724	2.25882	1.02115e-06
B9J08_004479	2.23614	1.86383e-05
B9J08_001673	2.14248	1.06485e-05
B9J08_000398	2.12109	0.000216448
B9J08_002227	2.08924	1.14564e-05
B9J08_000266	1.91448	0.00096668
B9J08_003694	1.89261	0.000599977
B9J08_002251	1.87877	0.00773816
B9J08_004135	1.85864	0.000178405
B9J08_001132	1.74235	0.00837364
B9J08_004514	1.67901	0.00837364
B9J08_003910	1.62941	0.0017549
B9J08_000594	1.62302	0.00370398
B9J08_002055	1.54923	0.00622031
B9J08_003563	1.49772	0.00773816
B9J08_004097	-1.42173	0.00771689
B9J08_004775	-1.55091	0.00773816
B9J08_001952	-1.6405	0.00837364
B9J08_004798	-1.64235	0.00264431
B9J08_003449	-1.69102	0.00676136
B9J08_000170	-1.74827	0.000769219
B9J08_002217	-1.82801	0.000261819
B9J08_002951	-1.87228	7.20995e-05
B9J08_002218	-1.89958	0.000270168
B9J08_004830	-2.02919	0.00201775
B9J08_005317	-2.11639	0.00695635
B9J08_004444	-2.12286	4.34437e-06
B9J08_000834	-2.18314	0.000165461
B9J08_001948	-2.18625	0.00148347
B9J08_003491	-2.32205	1.29574e-06
B9J08_001520	-2.39522	3.84346e-07
B9J08_000221	-2.42453	9.62232e-06
B9J08_003903	-2.46071	9.52674e-08
B9J08_004365	-2.51849	4.37388e-06
B9J08_000438	-2.53077	5.54597e-08
B9J08_004200	-2.63344	6.43637e-09
B9J08_002244	-3.03246	1.43591e-10
B9J08_005560	-3.07745	5.53906e-12
B9J08_003908	-3.44157	2.10036e-13
B9J08_003981	-4.03431	9.44403e-17
B9J08_000656	-4.26796	4.55503e-21
B9J08_002480	-5.26608	1.86326e-28
B9J08_001549	-6.12468	8.90147e-15
B9J08_002136	-10	1.10201e-77
