# Supplementary material for: Functional Redundancy in Candida auris Cell Surface Adhesins Crucial for Cell-Cell Interaction and Aggregation
Source: Research Square preprint supplement (doi:10.21203/rs.3.rs-4077218/v1), 2024-03-22
Supplement: Supplementary file 2 [file 96ff6f165ae383d49c3e5418.xlsx]

## Sheet: group82_vivo_vs_group87_vivo.de
Supplementary Table 2. Differentially expressed genes between AR0382/ AR0387 during in vivo biofilm growth (FDR <0.01, LFC >= |1.0|)
Values represent log (base 2) fold change of AR0382/ AR0387.
Gene ID	LFC (AR0382 in vivo/AR0387 in vivo)	FDR
B9J08_003891	4.95127	2.31693e-26
B9J08_001458	4.46607	7.10115e-26
B9J08_004100	3.6763	1.3524e-49
B9J08_004109	3.13969	3.35565e-61
B9J08_004544	2.97629	9.51455e-18
B9J08_000846	2.86548	0.00932734
B9J08_004451	2.85921	0.00024047
B9J08_004112	2.55754	1.84051e-06
B9J08_002459	2.54801	0.000805119
B9J08_000595	2.49307	6.89078e-18
B9J08_001899	2.48284	7.45867e-38
B9J08_000724	2.45569	7.23129e-08
B9J08_001362	2.45152	2.84296e-08
B9J08_002381	2.4283	6.52944e-05
B9J08_004987	2.32189	9.7389e-05
B9J08_001621	2.26987	5.30481e-05
B9J08_004446	2.26333	8.84068e-14
B9J08_004176	2.23264	0.000364348
B9J08_001861	2.22866	0.000251199
B9J08_000211	2.17734	0.000157798
B9J08_002830	2.16389	1.84436e-06
B9J08_004560	2.1423	0.000934143
B9J08_002847	2.13526	0.000637484
B9J08_001484	2.10889	0.000415757
B9J08_002919	2.08242	1.64939e-08
B9J08_002940	2.08232	4.62638e-06
B9J08_000178	2.053	0.000180945
B9J08_001581	2.05087	1.88224e-11
B9J08_003628	2.04287	0.00139686
B9J08_000987	2.04273	0.000315535
B9J08_004559	2.03997	1.42068e-06
B9J08_002012	2.02947	0.000299444
B9J08_004628	2.00523	9.82913e-05
B9J08_001552	1.98591	0.00931954
B9J08_004365	1.91535	0.000148015
B9J08_002668	1.90194	0.000319323
B9J08_002261	1.88529	0.00128845
B9J08_005380	1.86726	4.15337e-05
B9J08_002166	1.86498	1.06674e-06
B9J08_000388	1.85563	1.31702e-07
B9J08_004148	1.83859	0.000449841
B9J08_002239	1.83719	9.46315e-11
B9J08_004477	1.83315	1.25104e-08
B9J08_004905	1.82647	0.00106408
B9J08_004324	1.80722	1.39542e-11
B9J08_002825	1.8049	1.213e-10
B9J08_004167	1.80329	0.0036903
B9J08_004840	1.79789	0.00211366
B9J08_000592	1.79647	0.000319323
B9J08_003109	1.78451	1.32472e-08
B9J08_005394	1.77922	0.000319119
B9J08_000581	1.77512	9.82328e-05
B9J08_000849	1.7648	2.03046e-08
B9J08_002624	1.76338	0.000336098
B9J08_003514	1.73567	3.49324e-08
B9J08_001956	1.73221	0.0044792
B9J08_000594	1.72207	2.06086e-06
B9J08_000398	1.7175	1.28132e-06
B9J08_001551	1.70879	0.00894113
B9J08_001613	1.70778	0.00300238
B9J08_000007	1.69186	0.00102714
B9J08_001538	1.68383	0.000164436
B9J08_001323	1.67946	0.000239545
B9J08_002707	1.67784	9.59043e-05
B9J08_003466	1.66869	0.00911303
B9J08_004892	1.66375	6.00582e-08
B9J08_004831	1.66264	0.000973383
B9J08_003167	1.66157	8.3065e-05
B9J08_002423	1.64795	0.00664871
B9J08_001225	1.64597	0.000393969
B9J08_005163	1.63688	5.77634e-07
B9J08_004445	1.62982	2.65816e-21
B9J08_003223	1.62689	0.00643028
B9J08_004878	1.60595	0.00106485
B9J08_002240	1.60407	4.10018e-06
B9J08_004545	1.59564	6.36285e-09
B9J08_001588	1.59424	0.00128521
B9J08_002734	1.58405	0.00532268
B9J08_000792	1.56748	2.36685e-05
B9J08_000017	1.5564	0.00755772
B9J08_003007	1.54465	0.00603884
B9J08_003454	1.5421	0.00311783
B9J08_001255	1.54171	1.46051e-07
B9J08_002735	1.53936	0.00803802
B9J08_003374	1.53023	0.000143968
B9J08_000030	1.52115	5.77304e-06
B9J08_001181	1.51743	0.00223334
B9J08_002560	1.50981	3.46489e-05
B9J08_002773	1.50684	0.00579765
B9J08_003462	1.50198	0.00187064
B9J08_000829	1.48968	0.00426955
B9J08_005080	1.48179	0.00097909
B9J08_002255	1.47909	0.000934143
B9J08_004104	1.46795	0.000894896
B9J08_000501	1.45715	0.00553
B9J08_004637	1.45569	0.00139234
B9J08_002652	1.44687	8.67641e-07
B9J08_002165	1.44582	0.000148015
B9J08_001831	1.43525	0.0017846
B9J08_000474	1.43204	0.00251374
B9J08_003392	1.42231	0.00024047
B9J08_000847	1.42195	0.00678414
B9J08_002201	1.41652	0.000805119
B9J08_000925	1.41637	0.000484197
B9J08_001235	1.41549	0.000771486
B9J08_005147	1.40894	0.00164316
B9J08_002027	1.40554	0.000306871
B9J08_004877	1.39549	0.00859831
B9J08_004458	1.38604	0.000162083
B9J08_005081	1.3821	3.73987e-05
B9J08_002256	1.37403	6.47737e-06
B9J08_002628	1.37311	0.00279087
B9J08_004351	1.37232	0.00915864
B9J08_003258	1.37025	2.33711e-11
B9J08_003969	1.36947	0.00781016
B9J08_004027	1.36629	0.00561424
B9J08_003912	1.36162	3.85671e-10
B9J08_003750	1.35824	0.000107365
B9J08_000928	1.35106	6.1792e-05
B9J08_004366	1.34941	0.000864672
B9J08_001291	1.34825	0.000144145
B9J08_000010	1.34822	0.00456164
B9J08_004940	1.34179	1.31702e-07
B9J08_000995	1.33918	0.00151889
B9J08_000591	1.33887	2.65524e-06
B9J08_003694	1.33446	2.5957e-05
B9J08_002334	1.33278	0.000742306
B9J08_003909	1.32938	0.00302606
B9J08_003019	1.32098	2.87714e-06
B9J08_004367	1.31558	0.0034235
B9J08_005002	1.30496	1.44554e-07
B9J08_001352	1.29967	0.0028335
B9J08_005199	1.29932	8.67641e-07
B9J08_004934	1.29357	0.00649268
B9J08_004479	1.29128	2.74431e-07
B9J08_001968	1.2788	0.00906488
B9J08_000873	1.27452	0.00985089
B9J08_000292	1.27444	0.000157798
B9J08_003280	1.2683	0.000662188
B9J08_003397	1.26792	0.00620248
B9J08_001889	1.26498	0.00456164
B9J08_003448	1.26239	0.000201106
B9J08_002576	1.25861	0.000104979
B9J08_002351	1.2576	1.22636e-06
B9J08_002669	1.2573	0.00664871
B9J08_000905	1.25108	0.00397583
B9J08_003689	1.24553	0.00220488
B9J08_001371	1.24501	0.00344791
B9J08_003709	1.24107	0.00480238
B9J08_000615	1.24036	0.0017018
B9J08_002886	1.23335	0.000319323
B9J08_003186	1.22543	0.00574311
B9J08_002330	1.21141	0.000228867
B9J08_002279	1.20925	1.58811e-06
B9J08_002149	1.18041	0.000189404
B9J08_001834	1.18019	0.00532268
B9J08_003564	1.17049	0.00672379
B9J08_000397	1.16751	0.000106689
B9J08_004971	1.16195	0.00932734
B9J08_003337	1.16151	0.000485908
B9J08_000690	1.15964	0.00167565
B9J08_002577	1.15898	5.76364e-07
B9J08_002763	1.15838	0.0034235
B9J08_000348	1.15376	2.82372e-05
B9J08_001132	1.1532	7.02642e-06
B9J08_003955	1.15279	0.00187579
B9J08_004551	1.14953	0.0074585
B9J08_003227	1.14894	0.00304537
B9J08_000043	1.14831	0.00553
B9J08_001721	1.14511	6.36285e-09
B9J08_000032	1.14024	0.00294324
B9J08_004135	1.13354	0.00279087
B9J08_005107	1.12826	0.000914825
B9J08_002842	1.12185	0.00494526
B9J08_004316	1.12015	0.0039
B9J08_001041	1.11352	0.00737624
B9J08_004524	1.1117	0.00962402
B9J08_000814	1.10692	0.00378244
B9J08_005255	1.10509	0.0034235
B9J08_000029	1.10384	6.69285e-05
B9J08_004113	1.09837	9.70188e-05
B9J08_001116	1.09769	0.00412898
B9J08_004939	1.0904	0.00279087
B9J08_000071	1.0889	0.000134038
B9J08_001480	1.08888	1.5562e-08
B9J08_005386	1.08151	0.00269204
B9J08_001008	1.07598	0.00799194
B9J08_001224	1.07012	0.000456518
B9J08_005302	1.06893	0.00976949
B9J08_004988	1.06636	1.77412e-05
B9J08_003744	1.06237	0.000143968
B9J08_002972	1.06114	0.00737624
B9J08_004098	1.05257	0.00683968
B9J08_005514	1.04998	0.000336098
B9J08_003948	1.04178	0.0053357
B9J08_004750	1.04143	0.00229372
B9J08_000824	1.03606	0.00227359
B9J08_004584	1.0347	0.00801881
B9J08_004847	1.03089	0.00252073
B9J08_001615	1.01645	0.00592531
B9J08_002259	1.01342	2.93268e-05
B9J08_001364	1.01335	0.00128845
B9J08_004883	1.0089	0.00053678
B9J08_004793	1.00602	0.00148387
B9J08_000593	1.00192	3.54357e-06
B9J08_003070	1.00182	0.000908539
B9J08_005078	-1.00479	1.17545e-13
B9J08_000169	-1.0298	6.19151e-05
B9J08_003190	-1.03015	2.99481e-05
B9J08_002262	-1.03305	0.000120135
B9J08_000645	-1.03697	4.22539e-07
B9J08_004475	-1.05306	0.000144145
B9J08_002110	-1.0631	0.00701825
B9J08_002481	-1.10624	0.00267877
B9J08_000634	-1.10698	0.000387839
B9J08_000777	-1.13288	7.03709e-05
B9J08_000844	-1.13378	5.85555e-05
B9J08_005322	-1.13462	0.00456164
B9J08_003016	-1.13879	5.09341e-05
B9J08_002556	-1.14009	0.00113972
B9J08_001686	-1.15394	0.00153924
B9J08_003585	-1.16557	0.00737914
B9J08_003914	-1.18608	0.00554224
B9J08_001428	-1.23191	9.09002e-05
B9J08_000036	-1.24762	0.000879113
B9J08_001952	-1.26778	0.000130635
B9J08_001894	-1.32502	0.0012757
B9J08_003903	-1.33195	6.47737e-06
B9J08_004360	-1.34872	1.04491e-14
B9J08_001670	-1.36916	3.81436e-08
B9J08_003408	-1.37441	0.00831879
B9J08_003684	-1.38985	0.00617694
B9J08_002218	-1.44672	0.00638502
B9J08_005563	-1.46811	5.06065e-05
B9J08_004468	-1.51209	0.00296695
B9J08_002616	-1.53202	0.00304537
B9J08_000701	-1.54218	0.00106408
B9J08_000918	-1.54418	0.000158492
B9J08_002108	-1.55339	0.0039604
B9J08_001792	-1.58939	0.000101919
B9J08_001292	-1.6077	2.46264e-05
B9J08_005006	-1.65438	5.76364e-07
B9J08_001948	-1.65963	2.87714e-06
B9J08_004797	-1.68511	0.00701825
B9J08_002217	-1.78922	5.63375e-06
B9J08_004886	-1.83668	0.00781016
B9J08_001450	-1.86807	0.000387839
B9J08_002295	-1.90388	5.26532e-05
B9J08_004378	-1.91951	5.1426e-05
B9J08_001519	-1.99366	0.00574311
B9J08_000656	-2.05157	8.51935e-07
B9J08_002974	-2.09355	0.000439865
B9J08_002582	-2.15633	9.96879e-05
B9J08_004884	-2.70178	0.00107653
B9J08_003908	-2.75666	1.51211e-06
B9J08_001548	-2.88897	0.000353879
B9J08_001549	-3.15235	5.87371e-11
B9J08_001546	-3.23377	3.85671e-10
B9J08_002136	-8.7567	1.9321e-71
