# Supplementary material for: Functional Redundancy in Candida auris Cell Surface Adhesins Crucial for Cell-Cell Interaction and Aggregation
Source: Research Square preprint supplement (doi:10.21203/rs.3.rs-4077218/v1), 2024-03-22
Supplement: Supplementary file 3 [file e094506f398b7e961c79971b.xlsx]

## Sheet: Sheet1
Supplementary Table 3. List of genes that are more highly expressed in AR382 under both in vitro and in vivo biofilm conditions (FDR <0.01, LFC >= |1.0|)
	In vitro Biofilm		In vivo Biofilm
Gene ID	LFC (AR0382/ AR0387)	FDR	LFC (AR0382/ AR0387)	FDR	Gene Name/Homology	Annotation Notes
B9J08_001458	8.61155	4.78043e-29	4.46607	7.10115e-26	SCF1	adhesion
B9J08_004451	6.8096	7.97267e-37	2.85921	0.00024047
B9J08_000592	5.99198	5.93226e-25	1.79647	0.000319323
B9J08_004112	5.06925	3.81027e-24	2.55754	1.84051e-06	ALS5	adhesion
B9J08_004100	4.96597	2.50098e-19	3.6763	1.3524e-49
B9J08_001581	4.33666	1.31234e-17	2.05087	1.88224e-11
B9J08_003891	4.0008	2.37782e-05	4.95127	2.31693e-26
B9J08_001899	3.8909	7.92175e-10	2.48284	7.45867e-38
B9J08_004109	3.62476	1.85581e-10	3.13969	3.35565e-61	IFF4109	adhesion
B9J08_004446	3.55279	1.34241e-10	2.26333	8.84068e-14
B9J08_004545	3.32557	6.48754e-05	1.59564	6.36285e-09
B9J08_004098	3.04108	4.6236e-08	1.05257	0.00683968
B9J08_004544	2.97825	8.33604e-08	2.97629	9.51455e-18
B9J08_001362	2.52252	2.12779e-08	2.45152	2.84296e-08
B9J08_002256	2.49623	3.70424e-06	1.37403	6.47737e-06
B9J08_002886	2.29818	6.55818e-07	1.23335	0.000319323
B9J08_000724	2.25882	1.02115e-06	2.45569	7.23129e-08
B9J08_004479	2.23614	1.86383e-05	1.29128	2.74431e-07
B9J08_000398	2.12109	0.000216448	1.7175	1.28132e-06	SAP7	adhesion
B9J08_003694	1.89261	0.000599977	1.33446	2.5957e-05
B9J08_004135	1.85864	0.000178405	1.13354	0.00279087
B9J08_001132	1.74235	0.00837364	1.1532	7.02642e-06
B9J08_000594	1.62302	0.00370398	1.72207	2.06086e-06
